# Supplementary material
Source: Springer Nature journal article supplement (https://www.springermedizin.de/resource/supplementary/12885_2009_1590_MOESM1_ESM.pdf/9472414)

### Prospective

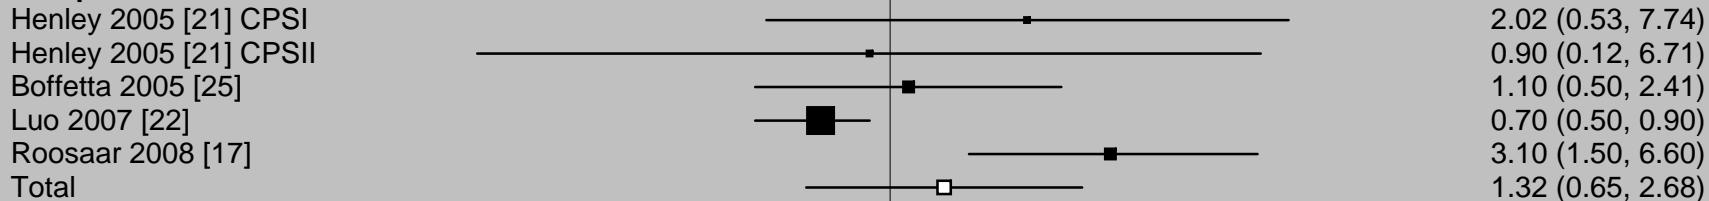

### Case-control before 1990

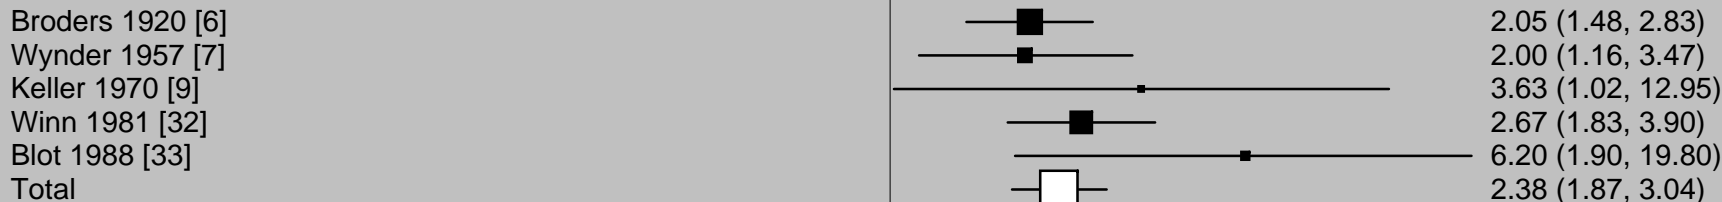

### Case-control since 1990

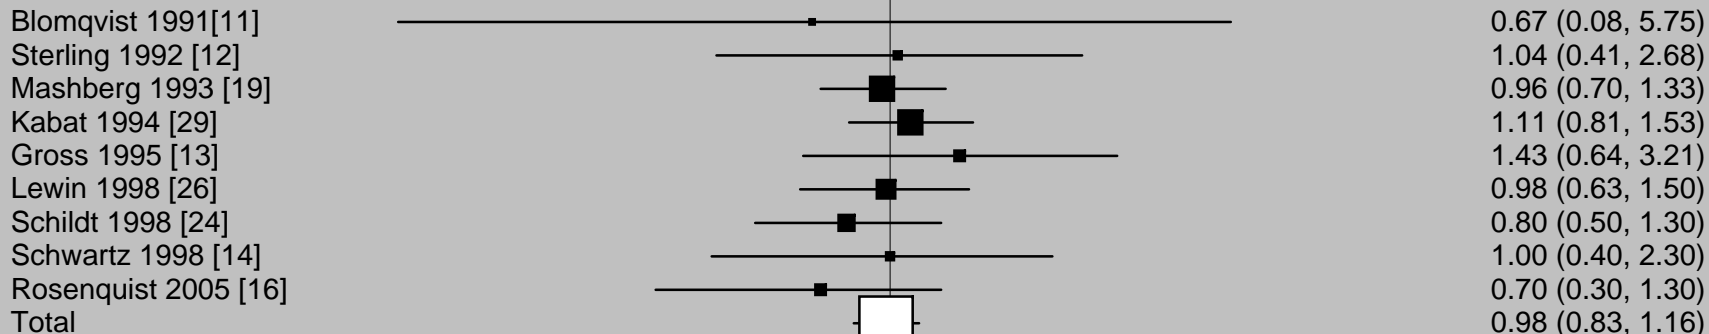

### Overall

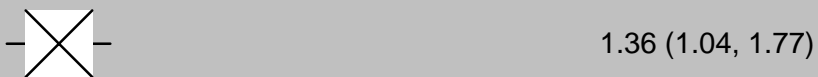

0.01 0.10 1.00 10.00 100.00

Supplement: MOESM1 [file 9472414]
